# Supplementary material for: Dynamics of Cytokine, SARS-CoV-2-Specific IgG, and Neutralizing Antibody Levels in COVID-19 Patients Treated with Convalescent Plasma
Source: MDPI journal article supplement (doi:10.3390/diseases11030112), 2023-08-30
Supplement: s1 [file s1]

### **Supplementary data**

We provide inter- and intra-assay CoV, specificity, and sensibility of the kits used for antibody and cytokine evaluations.

The Abbott SARS-CoV-2 IgG assay showcases an exceptional diagnostic specificity of 100.00% (95% CI: 95.89-100.00) in both inter- and intra-assay assessments. Furthermore, it displays a noteworthy sensitivity, with a diagnostic sensitivity of 99.60% (95% CI: 98.98-99.98). In the case of the Elecsys anti-SARS-CoV-2 assay, it demonstrates consistent inter-assay and intra-assay coefficients of variation (CoV), underscoring its robust performance. Significantly, the assay achieves a diagnostic specificity of 99.95% (99.87–99.99), emphasizing its precision in identifying true negative cases. Concurrently, the assay exhibits a substantial diagnostic sensitivity of 97.92% (95.21–99.32), highlighting its efficacy in detecting true positive cases.

Table S1. For intra- and inter-assay CV%, sensitivity, and assay working ranges for each platform

| Analyte         | Assay Working Ranges, pg/ml |        | Assay Sensitivity, pg/ml | Intra-Assay %CV | Inter-Assay %CV |
|-----------------|-----------------------------|--------|--------------------------|-----------------|-----------------|
|                 | LLOQ                        | ULOQ   | LOD                      |                 |                 |
| IFN- $\alpha$ 2 | 0.95                        | 15,569 | 0.46                     | 3.3             | 4.4             |
| IL-1 $\beta$    | 0.29                        | 4,672  | 0.24                     | 3.6             | 3.2             |
| IL-6            | 0.38                        | 6,244  | 0.34                     | 2.2             | 3.0             |
| IL-10           | 1.06                        | 17,427 | 0.69                     | 2.3             | 3.4             |
| IFN- $\beta$    | 1                           | 3,069  | 0.42                     | 2.95            | 20.78           |
| sIL-6R $\alpha$ | 17                          | 36,429 | 1.8                      | 2.02            | 10.51           |

CV, coefficient of variation; LLOQ, lower limit of quantitation; LOD, limit of detection; ULOQ, upper limit of quantitation.
